# Supplementary material for: Carbon-Based Transducers for Solid-Contact Calcium Ion-Selective Electrodes: Mesopore and Nitrogen-Doping Effects
Source: MDPI journal article supplement (doi:10.3390/membranes12090903), 2022-09-19
Supplement: s1 [file s1]

# Carbon-Based Transducers for Solid-Contact Calcium Ion-Selective Electrodes: Mesopore and Nitrogen-Doping Effects

Yirong Zhang, Yitian Tang, Rongfeng Liang, Lijie Zhong \*, Jiexian Xu, Huici Lu, Xiaofeng Xu, Tingting Han, Yu Bao, Yingming Ma, Shiyu Gan and Li Niu \*

**Table S1.** Comparison of the potentiometric performances of the NMC-based SC-ISEs with the reported Ca<sup>2+</sup>-SC-ISEs.

| Solid-Contact Materials                                                               | Slope                      | LOD      | Target Ion       | Stability                       | Short-Term Stability      | Capacitance | Reference |
|---------------------------------------------------------------------------------------|----------------------------|----------|------------------|---------------------------------|---------------------------|-------------|-----------|
| single-walled carbon nanotubes (SWCNTs)                                               | 28.7 mV dec <sup>-1</sup>  | 0.631 μM | Ca <sup>2+</sup> | 493 μV h <sup>-1</sup> .        | 930 μV s <sup>-1</sup>    | 5.37 μF     | 1         |
| single-walled carbon nanohorns (SWCNHs)                                               | 29.69 mV dec <sup>-1</sup> | 0.794 μM | Ca <sup>2+</sup> | /                               | 43 μV s <sup>-1</sup>     | 23.26 μF    | 2         |
| Ag@AgCl/1-tetradecylmethylimidazolium chloride                                        | 28.3 mV dec <sup>-1</sup>  | /        | Ca <sup>2+</sup> | /                               | 13.3 μV s <sup>-1</sup>   | 75.2 μF     | 3         |
| MXene (Ti <sub>3</sub> C <sub>2</sub> T <sub>x</sub> )                                | 26.4 mV dec <sup>-1</sup>  | 0.794 μM | Ca <sup>2+</sup> | /                               | 4.0 μV s <sup>-1</sup>    | 250 μF      | 4         |
| MXene (Ti <sub>2</sub> CT <sub>x</sub> )                                              | 24.9 mV dec <sup>-1</sup>  | 1.0 μM   | Ca <sup>2+</sup> | /                               | 5.0 μV s <sup>-1</sup>    | 200 μF      | 4         |
| NiCo <sub>2</sub> S <sub>4</sub> microsphere (NiCo <sub>2</sub> S <sub>4</sub> -EtOH) | 27.5 mV dec <sup>-1</sup>  | 0.5 μM   | Ca <sup>2+</sup> | 6.4 ± 0.3 μV h <sup>-1</sup>    | 1.77 μV s <sup>-1</sup>   | 565 μF      | 5         |
| Black phosphorous                                                                     | 28.3 mV dec <sup>-1</sup>  | 0.4 μM   | Ca <sup>2+</sup> | /                               | 72 μV s <sup>-1</sup>     | /           | 6         |
| nitrogen-doped mesoporous carbon (NMC)                                                | 26.3 mV dec <sup>-1</sup>  | 3.16 μM  | Ca <sup>2+</sup> | 66.9 ± 14.5 μV h <sup>-1</sup>  | 17.17 μV s <sup>-1</sup>  | 58.2 μF     | This work |
| reduced graphene oxide (RGO)                                                          | 26.5 mV dec <sup>-1</sup>  | 2.51 μM  | Ca <sup>2+</sup> | 189.8 ± 3.4 μV h <sup>-1</sup>  | 127.17 μV s <sup>-1</sup> | 7.9 μF      | This work |
| carbon nanotubes (CNT)                                                                | 27.4 mV dec <sup>-1</sup>  | 2.51 μM  | Ca <sup>2+</sup> | 160.3 ± 31.9 μV h <sup>-1</sup> | 123.08 μV s <sup>-1</sup> | 8.1 μF      | This work |

## References

1. Hernandez, R.; Riu, J.; Rius, F. X., Determination of calcium ion in sap using carbon nanotube-based ion-selective electrodes. *Analyst* **2010**, *135*, 1979-1985.
2. Jiang, C. M.; Yao, Y.; Cai, Y. L.; Ping, J. F., All-solid-state potentiometric sensor using single-walled carbon nanohorns as transducer. *Sens. Actuator B-Chem.* **2019**, *283*, 284-289.
3. Zeng, X. Z.; Qin, W., A solid-contact  $\text{Ca}^{2+}$ -selective electrode based on an inorganic redox buffer of  $\text{Ag@AgCl}/1$ -tetradecyl-3-methylimidazolium chloride as ion-to-electron transducer. *Talanta* **2020**, *209*, 120570.
4. Shao, Y. Z.; Yao, Y.; Jiang, C. M.; Zhao, F. N.; Liu, X. X.; Ying, Y. B.; Ping, J. F., Two-dimensional MXene nanosheets (types  $\text{Ti}_3\text{C}_2\text{T}_x$  and  $\text{Ti}_2\text{CT}_x$ ) as new ion-to-electron transducers in solid-contact calcium ion-selective electrodes. *Microchim. Acta* **2019**, *186*, 750.
5. Li, Y. H.; Li, J. H.; Qin, W., All-Solid-State Polymeric Membrane Ion-Selective Electrodes Based on  $\text{NiCo(2)S(4)}$  as a Solid Contact. *Anal. Chem.* **2022**, *94*, 3574-3580.
6. Kou, L. J.; Fu, M. L.; Liang, R. N., Solid-contact  $\text{Ca}^{2+}$ -selective electrodes based on two-dimensional black phosphorus as ion-to-electron transducers. *RSC Adv.* **2017**, *7*, 43905-43908.
